# Supplementary material
Source: PubMed Central journal article supplement (PMC2883949)
Supplement: E10-02-0082_1.pdf [file E10-02-0082_1.pdf]

### **Supplementary Figure S1. Pex11p, Ant1p and Pex8p targeting in wild-type cells.**

**A) + B)** Fluorescence pulse-chase experiments were performed in wild-type cells. The behaviour of polytopic membrane proteins Pex11p-YFP and YFP-Ant1p was examined in wild-type cells. Sixty min. after limited induction (15 min. galactose), both Pex11p-YFP (AZY409) YFP-Ant1p (AZY276) (green) were present in fluorescent foci that co-localised with the ER marker Sec63p-CFP (red). Wild-type peroxisomes marked with CFP-PTS1 (red) remained largely unlabeled by Pex11p-YFP (AZY507) or YFP-Ant1p (AZY275) at this early time-point. At 300 min. the YFP signal was organised in ER-independent foci marked as peroxisomes by the CFP-PTS1 label. **C)** Fluorescence pulse-chase experiments of the luminal protein Pex8p. YFP-tagged *PEX8* (green) was expressed from the *GALI* promoter. Peroxisomes were marked with CFP-PTS1 (red) (AZY247) while the ER was labelled with Sec63p-CFP (red) (AZY268). Sixty min. after limited induction (30 min. galactose induction), Pex8p-YFP appeared in the perinuclear ER and co-localised with Sec63p-CFP. Wild-type peroxisomes marked with CFP-PTS1 remained unlabelled by Pex8p-YFP at this early time-point. At 300 min., Pex8p-YFP signal concentrated into ER-independent foci and localised to the existing CFP-PTS1 labelled peroxisomes. Scale bar, 2 $\mu$ m.

### **Supplementary Figure S2. Pex2p, Pex13p, Pex15p and Pex6p targeting in *Δpex3* cells.**

Fluorescence pulse-chase experiment in peroxisome-deficient cells. Peroxisome formation is started by short exposure to galactose (30 min.) to induce synthesis of Pex3p. Before expression of *PEX3* there was no Pex15p-YFP (AZY202) signal (green), whereas Pex6p-YFP (AZY226) was largely cytosolic. However, a small but significant population of Pex2p-YFP (AZY203) and Pex13p-YFP marked cells (AZY189) showed punctate staining that co-localised with the ER marker Sec63p-CFP (red). Sixty min. after galactose induced *PEX3* expression, all cells expressing *PEX2*-, *PEX13*-, *PEX15*- or *PEX6*-YFP contained this punctate staining. Later all

PMPs started to concentrate into foci frequently localised on or at the periphery of the ER (90 min.). At 120 min. the YFP-signal of all Pex proteins localised exclusively to structures mostly no longer overlapping with the Sec63p-CFP signal. At 300 min. the peroxisomal population in the cell has been restored and up to 5 individual YFP-containing foci per cell were visible. Scale bar, 2 $\mu$ m.

**Supplementary Figure S3. PMPs are ER localised in  $\Delta pex3$  and  $\Delta pex19$  cells.**

C-terminally YFP tagged PMPs expressed from their endogenous promoters were inspected by fluorescence microscopy in peroxisome deficient ( $\Delta pex3$  or  $\Delta pex19$ ) cells and in wild-type cells. Pex2p-YFP and Pex11p-YFP co-localised with the perinuclear ER, as shown by the complete co-localisation with the ER marker Sec63p-CFP in both  $\Delta pex3$  and  $\Delta pex19$  cells. Pex8p-YFP, Pex13p-YFP and Pex14p-YFP on the other hand concentrated into an ER localised dot in both mutant cells. In wild-type cells, all PMPs shown are present in multi-punctate structures (peroxisomes) and co-localisation with the ER marker Sec63p-CFP was rare. Scale bar, 2 $\mu$ m.

**Supplementary Figure S4. The role of Get3p in ER membrane protein import.**

**A)** Chromosomally tagged *YFP-NYV1* was placed under control of the *GALI* promoter and expressed in wild-type (AZY296) or in *GET3* deleted (AZY297) cells. Cells expressing *YFP-NYV1* showed fragmented vacuoles (stained with FM4-64; red) prior to induction. After 30 min. of galactose induction in wild-type cells, YFP-Nyv1p (green) reached vacuoles within 120 min., concomitant with a recovery of the vacuolar fragmentation phenotype. In  $\Delta get3$  cells, YFP-Nyv1p accumulated in the cytosol and consequently vacuoles remained fragmented. **B)**

Ectopically tagged *PEX13-YFP* was placed under control of the *GALI* promoter and expressed in

wild-type (AZY254) or in *GET3* deleted cells (AZY298). Within 120 min. after limited expression of *PEX13-YFP* (15 min. galactose), Pex13p-YFP fluorescence (green) co-localised with CFP-PTS1 labelled peroxisomes (red) in both wild-type and  $\Delta get3$  cells. Scale bar, 2 $\mu$ m.

## Supplementary Data

**Table S1:** Yeast strains used in this work

| Name   | Genotype                                                                                                                                                                                                                    | Source or reference |
|--------|-----------------------------------------------------------------------------------------------------------------------------------------------------------------------------------------------------------------------------|---------------------|
| BY12   | <i>MATa MET3::SEC63-kanMX4 MET3::SEC62-kanMX4 ade2-1 his3-11 trp1-1 ura3-1</i>                                                                                                                                              | C.J. Stirling       |
| FY1679 | <i>MATa/ura3-52<math>\Delta</math>/ura3-52<math>\Delta</math> trp1<math>\Delta</math>63/trp1<math>\Delta</math>63 leu2<math>\Delta</math> leu2<math>\Delta</math> his3<math>\Delta</math>200/his3<math>\Delta</math>200</i> | Euroscarf           |
| AZY141 | <i>MAT<math>\alpha</math> PEX8::YFP-His3MX6 ura3-52<math>\Delta</math> trp1<math>\Delta</math>63 leu2<math>\Delta</math></i>                                                                                                | This study          |
| AZY145 | <i>MAT<math>\alpha</math> PEX8::YFP-His3MX6 SEC63::CFP-KanMX6 ura3-52<math>\Delta</math> trp1<math>\Delta</math>63 leu2<math>\Delta</math></i>                                                                              | This study          |
| AZY146 | <i>MAT<math>\alpha</math> PEX11::YFP-His3MX6 SEC63::CFP-KanMX6 ura3-52<math>\Delta</math> trp1<math>\Delta</math>63 leu2<math>\Delta</math></i>                                                                             | This study          |
| AZY147 | <i>MAT<math>\alpha</math> PEX13::YFP-His3MX6 SEC63::CFP-KanMX6 ura3-52<math>\Delta</math> trp1<math>\Delta</math>63 leu2<math>\Delta</math></i>                                                                             | This study          |
| AZY148 | <i>MAT<math>\alpha</math> PEX14::YFP-His3MX6 SEC63::CFP-KanMX6 ura3-52<math>\Delta</math> trp1<math>\Delta</math>63 leu2<math>\Delta</math></i>                                                                             | This study          |
| AZY149 | <i>MAT<math>\alpha</math> PEX15::YFP-His3MX6 SEC63::CFP-KanMX6 ura3-52<math>\Delta</math> trp1<math>\Delta</math>63 leu2<math>\Delta</math></i>                                                                             | This study          |
| AZY150 | <i>MAT<math>\alpha</math> PEX8::YFP-His3MX6 SEC63::CFP-KanMX6 pex3<math>\Delta</math>1::klTRP1 ura3-52<math>\Delta</math> leu2<math>\Delta</math></i>                                                                       | This study          |
| AZY151 | <i>MAT<math>\alpha</math> PEX11::YFP-His3MX6 SEC63::CFP-KanMX6 pex3<math>\Delta</math>1::klTRP1 ura3-52<math>\Delta</math> leu2<math>\Delta</math></i>                                                                      | This study          |
| AZY152 | <i>MAT<math>\alpha</math> PEX13::YFP-His3MX6 SEC63::CFP-KanMX6 pex3<math>\Delta</math>1::klTRP1 ura3-52<math>\Delta</math> leu2<math>\Delta</math></i>                                                                      | This study          |
| AZY153 | <i>MAT<math>\alpha</math> PEX14::YFP-His3MX6 SEC63::CFP-KanMX6 pex3<math>\Delta</math>1::klTRP1 ura3-52<math>\Delta</math> leu2<math>\Delta</math></i>                                                                      | This study          |
| AZY154 | <i>MAT<math>\alpha</math> PEX15::YFP-His3MX6 SEC63::CFP-KanMX6 pex3<math>\Delta</math>1::klTRP1 ura3-52<math>\Delta</math> leu2<math>\Delta</math></i>                                                                      | This study          |
| AZY155 | <i>MAT<math>\alpha</math> PEX8::YFP-His3MX6 SEC63::CFP-KanMX6 pex19<math>\Delta</math>1::klTRP1 ura3-52<math>\Delta</math> leu2<math>\Delta</math></i>                                                                      | This study          |
| AZY156 | <i>MAT<math>\alpha</math> PEX11::YFP-His3MX6 SEC63::CFP-KanMX6 pex19<math>\Delta</math>1::klTRP1 ura3-52<math>\Delta</math> leu2<math>\Delta</math></i>                                                                     | This study          |
| AZY157 | <i>MAT<math>\alpha</math> PEX13::YFP-His3MX6 SEC63::CFP-KanMX6 pex19<math>\Delta</math>1::klTRP1 ura3-52<math>\Delta</math> leu2<math>\Delta</math></i>                                                                     | This study          |

|        |                                                                                                                          |                                        |
|--------|--------------------------------------------------------------------------------------------------------------------------|----------------------------------------|
| AZY158 | <i>MATα PEX14::YFP-His3MX6 SEC63::CFP-KanMX6 pex19Δ1::klTRP1 ura3-52Δ leu2Δ1</i>                                         | This study                             |
| AZY159 | <i>MATα PEX15::YFP-His3MX6 SEC63::CFP-KanMX6 pex19Δ1::klTRP1 ura3-52Δ leu2Δ1</i>                                         | This study                             |
| AZY160 | <i>MATα PEX2::YFP-His3MX6 SEC63::CFP-KanMX6 ura3-52Δ trp1Δ63 leu2Δ1</i>                                                  | This study                             |
| AZY161 | <i>MATα PEX2::YFP-His3MX6 SEC63::CFP-KanMX6 pex3Δ1::klTRP1 ura3-52Δ leu2Δ1</i>                                           | This study                             |
| AZY162 | <i>MATα PEX2::YFP-His3MX6 SEC63::CFP-KanMX6 pex19Δ1::klTRP1 ura3-52Δ leu2Δ1</i>                                          | This study                             |
| AZY189 | <i>MATα PEX13::YFP-His3MX6 SEC63::CFP-KanMX6 pex3Δ1::klTRP1 ura3-52Δ trp1Δ63 -LEU2(pAZ102) his3Δ200</i>                  | This study<br><i>leu2Δ1::GAL1-PEX3</i> |
| AZY191 | <i>MATα PEX14::YFP-His3MX6 SEC63::CFP-KanMX6 pex3Δ1::klTRP1 ura3-52Δ trp1Δ63 -LEU2(pAZ102) his3Δ200</i>                  | This study<br><i>leu2Δ1::GAL1-PEX3</i> |
| AZY192 | <i>MATα PEX14::YFP-His3MX6 pex3Δ1::klTRP1 ura3-52Δ1::CFP-PTS1-URA3 (pEW177) leu2Δ1::GAL1-PEX3 -LEU2(pAZ102) his3Δ200</i> | This study<br><i>trp1Δ63</i>           |
| AZY193 | <i>MATα SEC63::CFP-KanMX6 PEX3::YFP-His3MX6 pex19Δ1::NatMX ura3-52Δ1 trp1Δ63</i>                                         | This study<br><i>his3Δ200</i>          |
| AZY202 | <i>MATα PEX15::YFP-His3MX6 SEC63::CFP-KanMX6 pex3Δ1::klTRP1 ura3-52Δ trp1Δ63 -LEU2(pAZ102) his3Δ200</i>                  | This study<br><i>leu2Δ1::GAL1-PEX3</i> |
| AZY203 | <i>MATα PEX2::YFP-His3MX6 SEC63::CFP-KanMX6 pex3Δ1::klTRP1 ura3-52Δ trp1Δ63 -LEU2(pAZ102) his3Δ200</i>                   | This study<br><i>leu2Δ1::GAL1-PEX3</i> |
| AZY205 | <i>MATα SEC63::CFP-KanMX6 PEX14::YFP-His3MX6 pex19Δ1:: klTRP1 ura3-52Δ trp1Δ63 his3Δ200</i>                              | This study<br><i>leu2Δ1</i>            |
| AZY226 | <i>MATα PEX6::YFP-His3MX6 SEC63::CFP-KanMX6 pex3Δ1::klTRP1 ura3-52Δ trp1Δ63 -LEU2(pAZ102) his3Δ200</i>                   | This study<br><i>leu2Δ1::GAL1-PEX3</i> |
| AZY247 | <i>MATα ura3-52Δ1::CFP-PTS1-URA3(pEW177) trp1Δ63 leu2Δ1::GAL1-PEX8-YFP-LEU2(pTH2)</i>                                    | This study<br><i>his3Δ200</i>          |
| AZY249 | <i>MATα PEX8::YFP-His3MX6 pex3Δ1:: klTRP1 MET3::SEC63-kanMX4 MET3::SEC62-kanMX4 trp1-1 ura3-1</i>                        | This study<br><i>ade2-1 his3-11</i>    |
| AZY250 | <i>MATα PEX8::YFP-His3MX6 MET3::SEC63-kanMX4 MET3::SEC62-kanMX4 ade2-1 his3-11 ura3-1</i>                                | This study<br><i>trp1-1</i>            |
| AZY253 | <i>MATα SEC63::CFP-KanMX6 ura3-52Δ1trp1Δ63 leu2Δ1::GAL1-PEX13 -LEU2 (pEW200)</i>                                         | This study<br><i>his3Δ200</i>          |

|        |                                                                                                                         |                              |
|--------|-------------------------------------------------------------------------------------------------------------------------|------------------------------|
| AZY254 | <i>MATα ura3-52Δ1::CFP-PTS1-URA3(pEW177) trp1Δ63 leu2Δ1::GAL1-PEX13 -LEU2 (pEW200)</i><br>This study                    | <i>his3Δ200</i>              |
| AZY258 | <i>MATα ura3-52Δ1::CFP-PTS1-URA3(pEW177) pex13Δ1::klTRP1 ura3-52Δ trp1Δ63 leu2Δ1</i><br><i>his3Δ200</i>                 | This study                   |
| AZY268 | <i>MATα SEC63::CFP-KanMX6 ura3-52Δ trp1Δ63 leu2Δ1::GAL1-PEX8-YFP-LEU2(pTH2)</i><br>This study                           | <i>his3Δ200</i>              |
| AZY275 | <i>MATα GAL1-YFP::ANT1-His3MX6 ura3-52Δ1::CFP-PTS1-URA3 (pEW177) trp1Δ63 leu2Δ1</i><br><i>his3Δ200</i>                  | This study                   |
| AZY276 | <i>MATα SEC63::CFP-KanMX6 GAL1-YFP::ANT1-His3MX6 ura3-52Δ1 trp1Δ63 leu2Δ1 his3Δ200</i>                                  | This study                   |
| AZY278 | <i>MATα GAL1-YFP::PEX15 -kanMX6 get3Δ1::His3MX ura3-52Δ1::CFP-PTS1-URA3(pEW177)</i><br><i>leu2Δ1 his3Δ200</i>           | This study<br><i>trp1Δ63</i> |
| AZY289 | <i>MATα PEX13::YFP-His3MX6 MET3::SEC63-kanMX4 MET3::SEC62-kanMX4 ade2-1 his3-11</i><br><i>ura3-1</i>                    | This study<br><i>trp1-1</i>  |
| AZY296 | <i>MATα GAL1-YFP::NYV1 -kanMX6 ura3-52Δ1::CFP-PTS1-URA3(pEW177) trp1Δ63 leu2Δ1</i><br><i>his3Δ200</i>                   | This study                   |
| AZY297 | <i>MATα GAL1-YFP::NYV1 -kanMX6 get3Δ1::His3MX ura3-52Δ1::CFP-PTS1-URA3(pEW177)</i><br><i>leu2Δ1 his3Δ200</i>            | This study<br><i>trp1Δ63</i> |
| AZY298 | <i>MATα get3Δ1::His3MX ura3-52Δ1::CFP-PTS1-URA3(pEW177) trp1Δ63</i><br><i>leu2Δ1::GAL1-PEX13 -LEU2(pEW200) his3Δ200</i> | This study                   |
| AZY299 | <i>MATα GAL1-YFP::PEX15 -kanMX6 ura3-52Δ1::CFP-PTS1-URA3(pEW177) trp1Δ63 leu2Δ1</i><br><i>his3Δ200</i>                  | This study                   |
| AZY341 | <i>MATα SEC63::CFP-KanMX6 ura3-52Δ1 pex19Δ1::klTRP1 leu2Δ1::GAL1-PEX13 -YFP-LEU2</i><br><i>his3Δ200</i>                 | (pEW200)<br>This study       |
| AZY409 | <i>MATα SEC63::CFP-KanMX6 ura3-52Δ1:: GAL1-PEX11-YFP-URA3(pTH9) trp1Δ63leu2Δ1</i><br><i>his3Δ200</i>                    | (pTH9)<br>This study         |
| AZY412 | <i>MATα ura3-52Δ1:: GAL1-PEX11-YFP-URA3 (pTH9) trp1Δ63::CFP-PTS1-URA3 (pEW171)</i><br><i>leu2Δ1 his3Δ200</i>            | This study                   |

**Table S2: Oligonucleotides**

---

**Oligonucleotides used for PCR based gene targeting**

**S1-S2** used for synthesis of deletion cassette

**Fus1-S2** used for synthesis of C-terminal XFP fusion cassette

**Nfus1-Nfus2** used for synthesis of N-terminal GAL-XFP fusion cassette

|                    |                                                                              |
|--------------------|------------------------------------------------------------------------------|
| <b>Pex2_Fus1</b>   | 5' -GATGCCTGTGGATCCTCTGGGAGACTGACCGCCTCACCAGTGTACGGTCGACGGATCCCCGGGT-3'      |
| <b>Pex2_S2</b>     | 5' -ATGAATATAGTATACACATATATAGAGATACAAGCGAGGGAACGGCATCGATGAATTCGAGCTCG-3'     |
| <b>Pex3_S1</b>     | 5' -ATGGCCCCAAATCAAAGATCACGTTTCGCTTCTGCAGAGACATCGAGCTTCGTACGCTGCAGGTCG-3'    |
| <b>Pex3_S2</b>     | 5' -CGCTATATATATATATATATCTGGTGTGAGTGTCACTTATTTCACATCGATGAATTCGAGCTCG-3'      |
| <b>Pex3_Fus1</b>   | 5' -ATACAGCAACTTTGGCGTCTCCAGCTCGTTTTCTTCAAGCCTGGTCGACGGATCCCCGGGT-3'         |
| <b>Pex6_Fus1</b>   | 5' -GAACTGAATCATTATGAAGCGGTGAGAGCTAATTTTGAAGGTGCTGGTCGACGGATCCCCGGGT-3'      |
| <b>Pex6_S2</b>     | 5' -AATATGGGACATATATTTACAAATTTACCTATACGCTCTGAGTTGCATCGATGAATTCGAGCTCG-3'     |
| <b>Pex8_Fus1</b>   | 5' -GACTGGTGGTACACAACGGTCTTATCAAGTCAATCTTCTAAATTAGGTTCGACGGATCCCCGGGT-3'     |
| <b>Pex8_S2</b>     | 5' -TTGAGAAAAAGGAATATAAAAAAGGCGCTACTATAAAGTACTTAACATCGATGAATTCGAGCTCG-3'     |
| <b>Pex11_Fus1</b>  | 5' -GTTGTCACATCTATCCTTGGTATGCAAGACATGTGGAAGCTACAGGTTCGACGGATCCCCGGGT-3'      |
| <b>Pex11_S2</b>    | 5' -AAAGAAGGTCGAATCAAACATAAGCGGAGAAATAGCCAAATAAACATCGATGAATTCGAGCTCG-3'      |
| <b>Pex13_Fus1</b>  | 5' -AGACGGAAGAAAATTGAGCATGTTGATGATGAAACCGCTACACACGGTCGACGGATCCCCGGGT-3'      |
| <b>Pex13_S2</b>    | 5' -ACTTTAGATTTTACTATATATATATGCGAATATATGTGTGCAAATCATCGATGAATTCGAGCTCG-3'     |
| <b>Pex14_Fus1</b>  | 5' -AGTGTCCCTGACTGGCAAATGGACAGGTGCAAGACTCCATCCCAGGTTCGACGGATCCCCGGGT-3'      |
| <b>Pex14_S2</b>    | 5' -TTACAATTACAATTTCCGTTAAAAAATAAATTACTTACATAGAATCATCGATGAATTCGAGCTCG-3'     |
| <b>Pex15_Fus1</b>  | 5' -ATACCCCCAGATTGTAGGGTTGCTAAAACCTTCTAGCGAGTATAGGTTCGACGGATCCCCGGGT-3'      |
| <b>Pex15_S2</b>    | 5' -TGTCATTAAAATAAGTAGGTAGGGTTTTATAAACTATTCAAATATCATCGATGAATTCGAGCTCG-3'     |
| <b>Pex15_Nfus1</b> | 5' -CATATTTAGGCAAGAGAAATAGTTAGGTAAACAGAAAGAGGCGAATTCGAGCTCGTTTAAAC-3'        |
| <b>Pex15_Nfus2</b> | 5' -GGGAATGCATAGGCAGATTGTTTCATTATCTCACTTGCAGCCATTTTGTATAGTTCATCCATGC-3'      |
| <b>Pex19_S1</b>    | 5' -AGTATTGACGGAAGAAGAAATGCCAAACATACAACACGAAGTAAGCTTCGTACGCTGCAGGTCG-3'      |
| <b>Pex19_S2</b>    | 5' -TTTTTAAAGTGTATACTTAGTTATGCTCTAGGATAATGAACTACCATCGATGAATTCGAGCTCG-3'      |
| <b>Ant1_Nfus1</b>  | 5' -GAAGAGCAAGAAGATGTGCAAAAAATAGAGAAAATATGATGCTGGAATTCGAGCTCGTTTAAAC-3'      |
| <b>Ant1_Nfus2</b>  | 5' -CCGAAGCCACAGCGCCAGTTAATGCAGACTCTAGAGTTAACATTTTGTATAGTTCATCCATGC-3'       |
| <b>Get3_S1</b>     | 5' -GGAAAACGTACGACAAGAACAAGAAGATCATCACATTGTAATTGCTTCGTACGCTGCAGGTCG-3'       |
| <b>Get3_S2</b>     | 5' -CTATGGTTATATGTCGTATGTATCTATTTATGGTATTCAGGGGCTTCATCGATGAATTCGAGCTCG-3'    |
| <b>Nyv1_Nfus1</b>  | 5' -AGGGATTATGCGAATGCTCATCCCCCATGCCATAATTTTACGAATTCGAGCTCGTTTAAAC-3'         |
| <b>Nyv1_Nfus2</b>  | 5' -CACCATTTTTTATAACTTCCACATAACTTACTAAGACCATTTTGTATAGTTCATCCATGC-3'          |
| <b>Sec63_Fus1</b>  | 5' -TACTGATATCGATACGGATACAGAAGCTGAAGATGATGAATCACCAGAAGGTTCGACGGATCCCCGGGT-3' |

**Sec63\_S2**

5' -AAAGATGAAATATATACGCTAAGAGCTAAAATGAAAACTATACTAATCCATCGATGAATTCGAGCTCG-3'

## Oligonucleotides used for cloning

**Pex8-HindIII\_F** 5' -CCCAAGCTTATGTTTGATCATGACGTCG-3'

**Pex8-HindIII\_R** 5' -CCCAAGCTTTAATTTAGAAGATTGACTTGATAAGACCG-3'

**Pex11-BamHI\_F** 5' -CGGGATCCATGGTCTGTGATACACTGGTATATC-3'

**Pex11-HindIII\_F** 5' - CCAAGCTTTGTAGCTTCCACATGTCTGCATACCAAGG-3'

**YFP-HindIII\_F** 5' - CCAAGCTTAGTAAAGGAGAAGAAGCTTTTCAC-3'

**YFP-XhoI\_R** 5' - CCGCTCGAGCTATTTGTATAGTTCATCCATGCC-3'



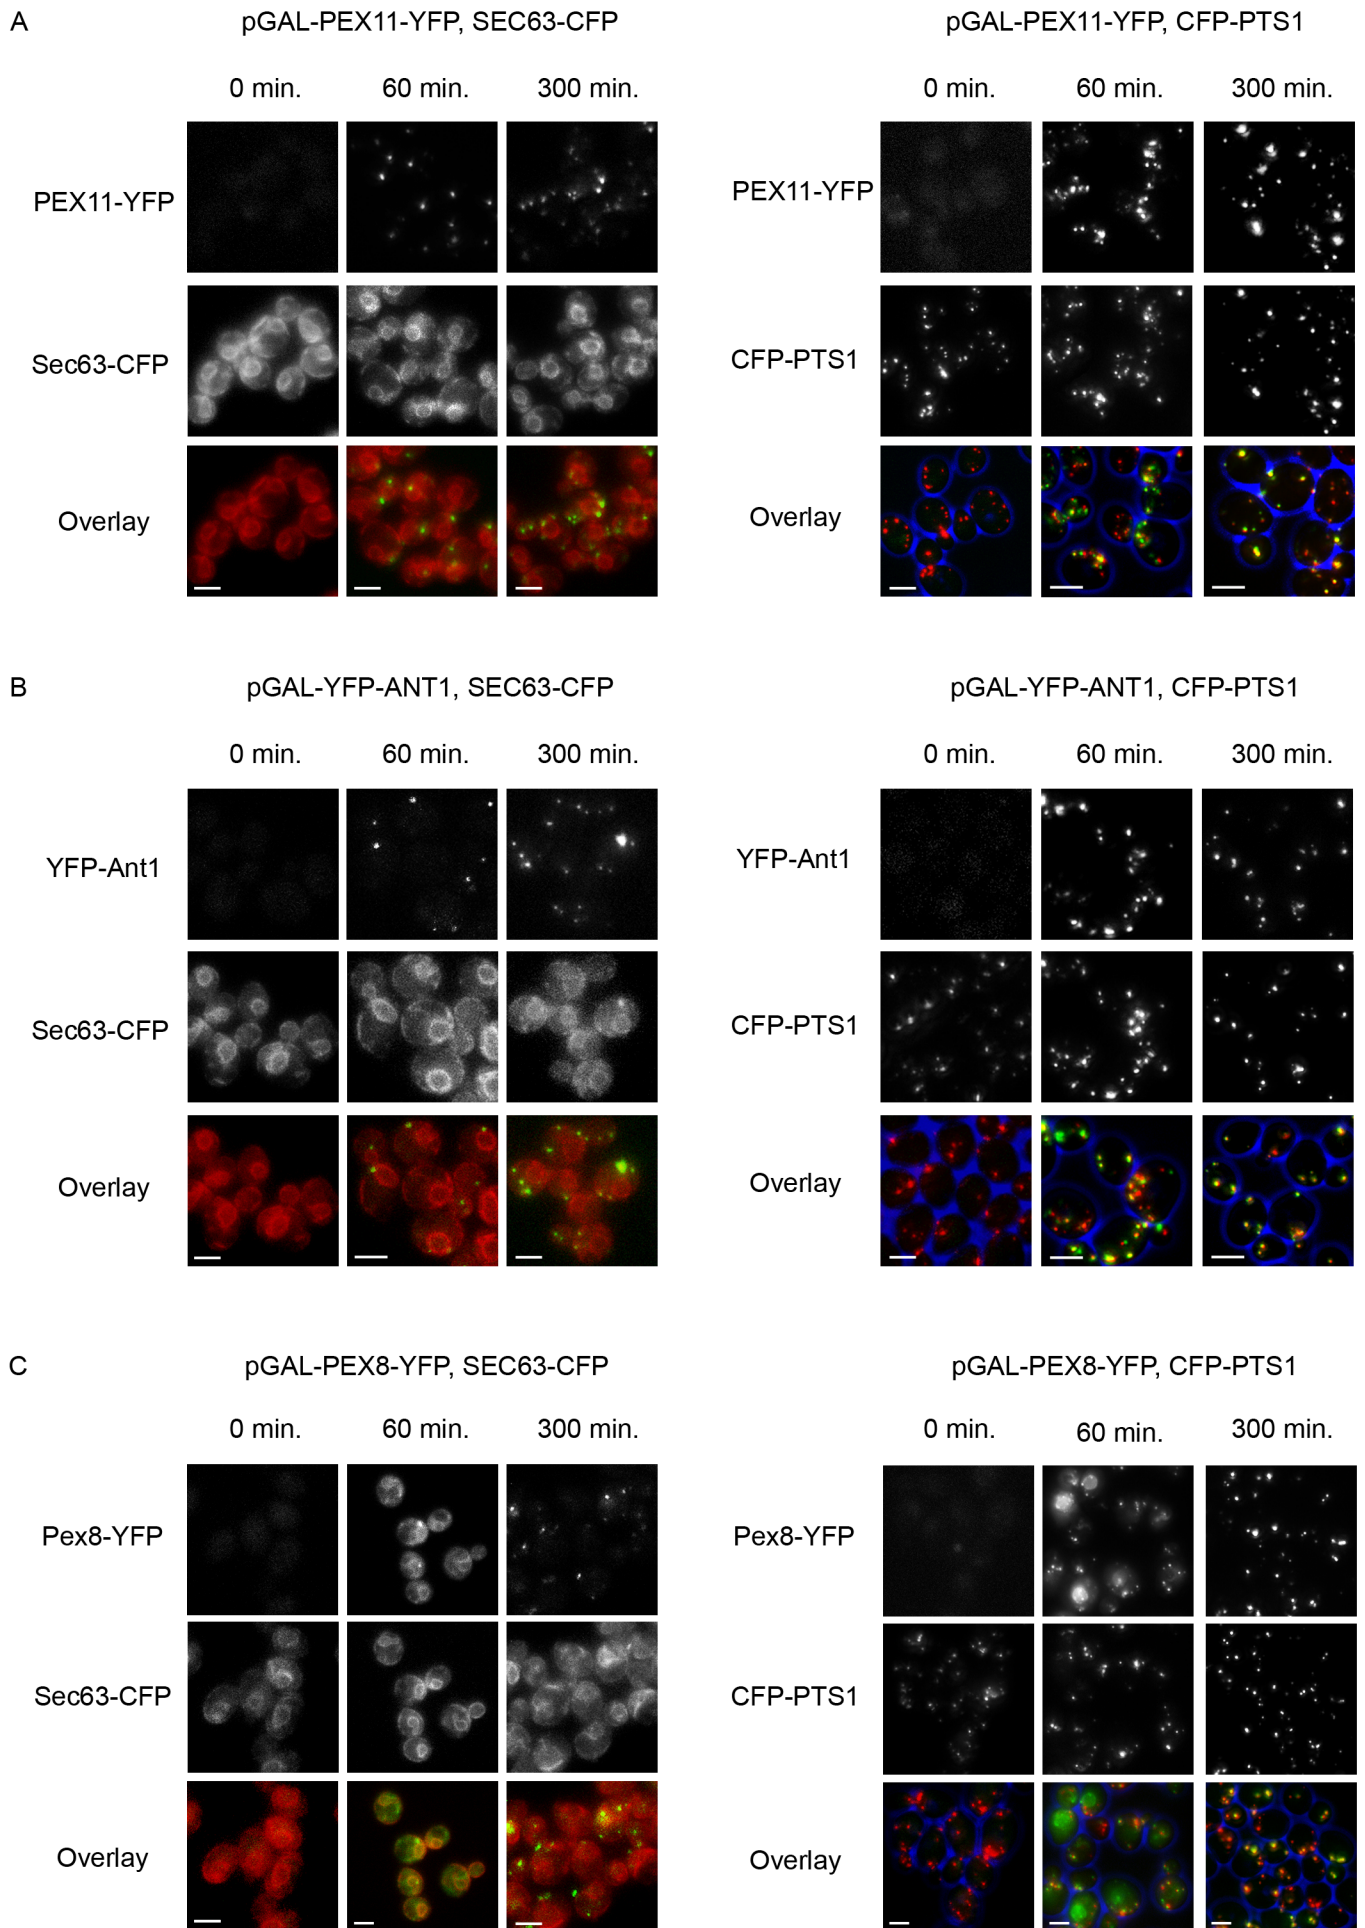

Van der Zand et al. Supplementary Figure S2

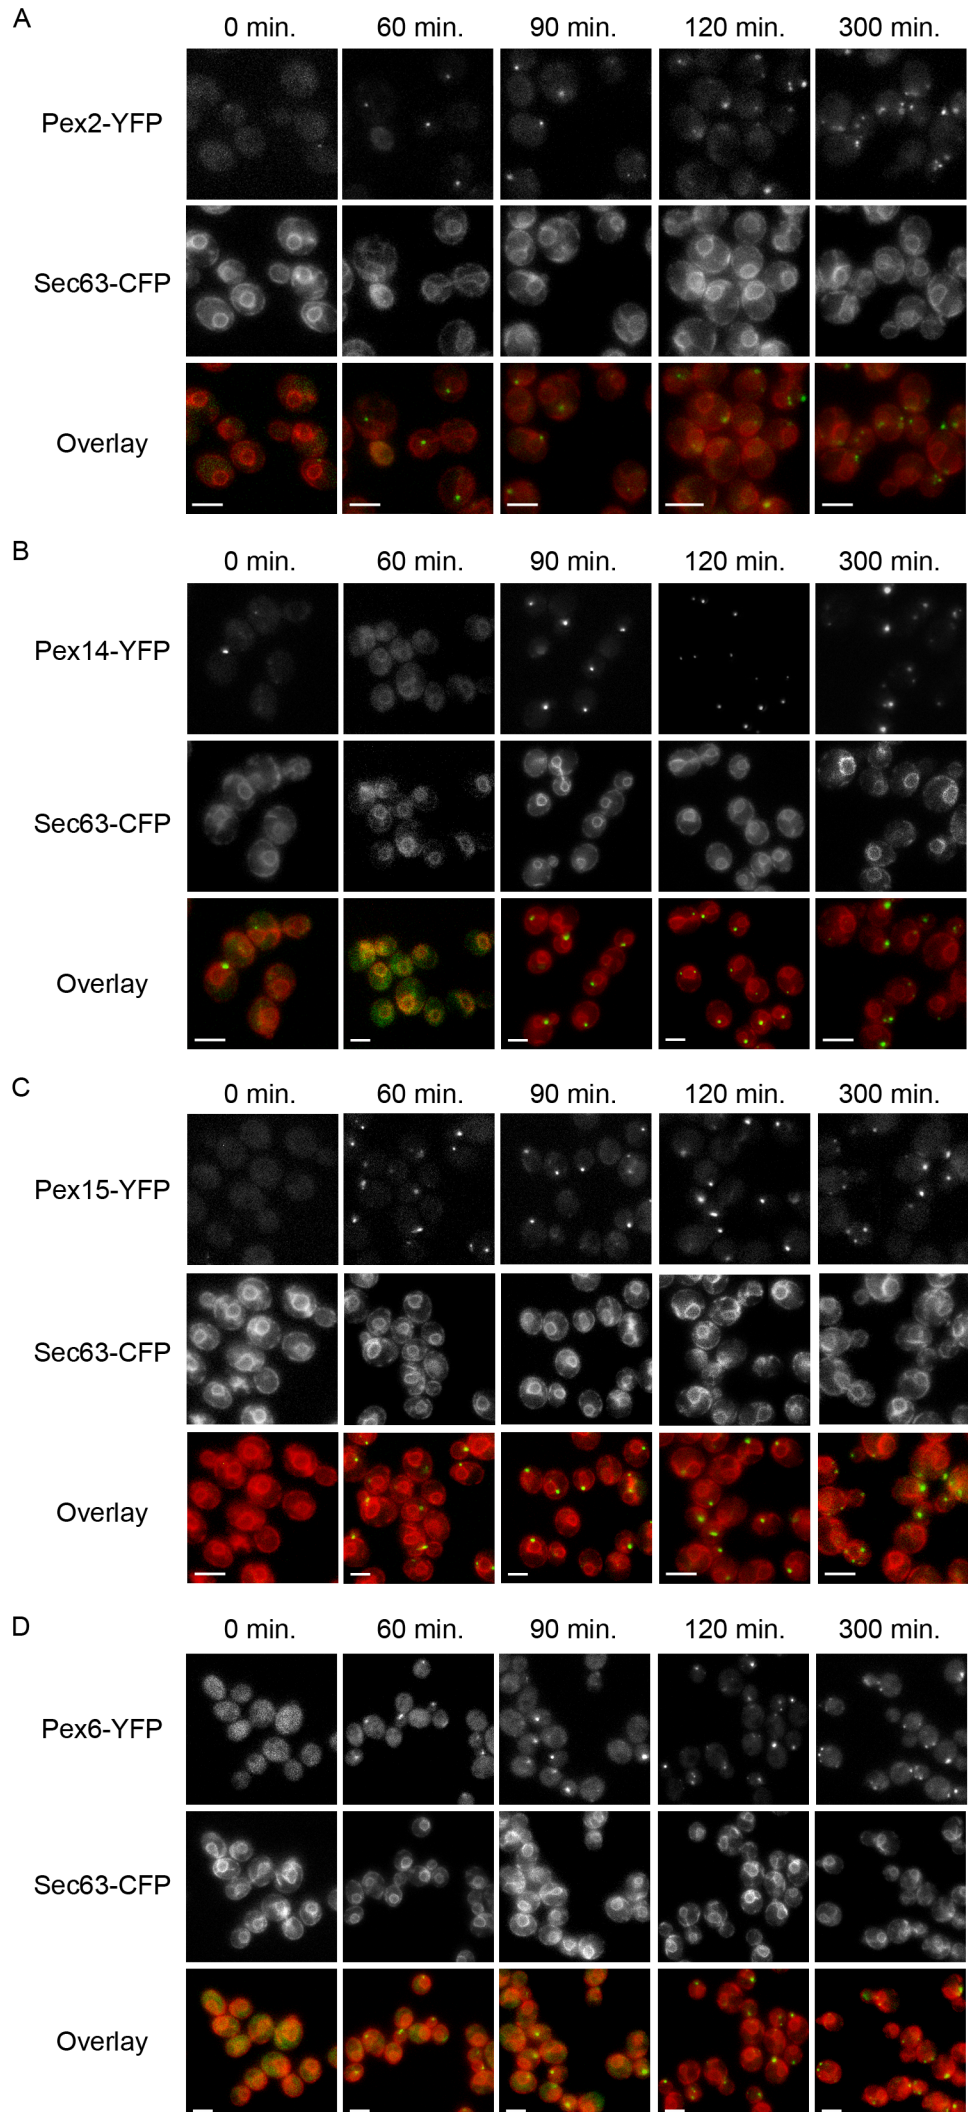

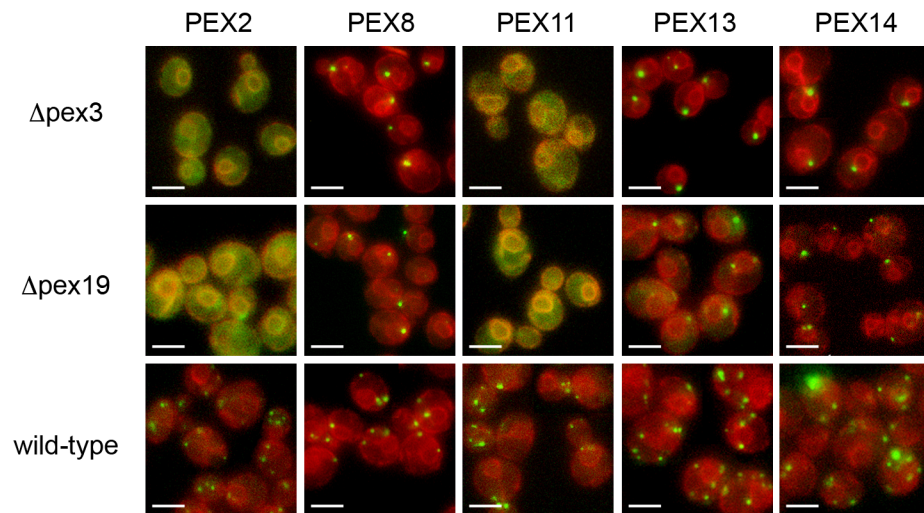

Supplementary Figure S3 Van der Zand et al.

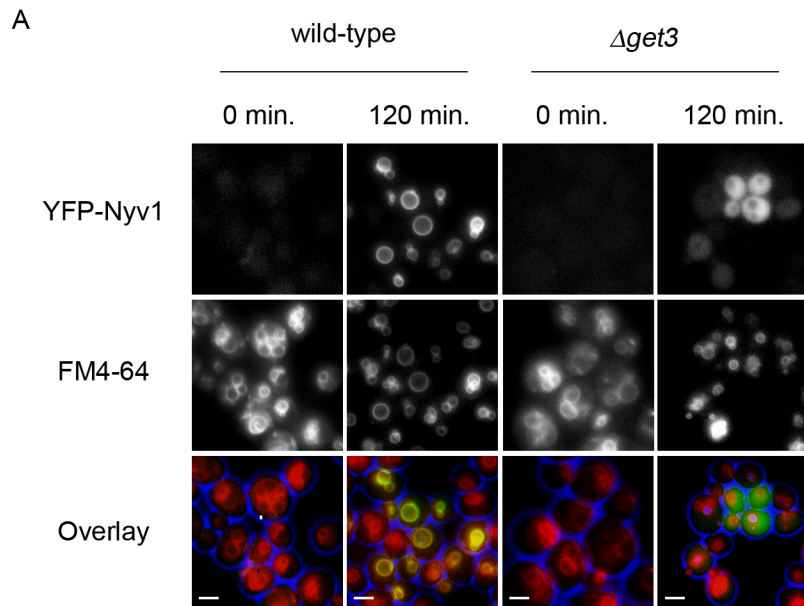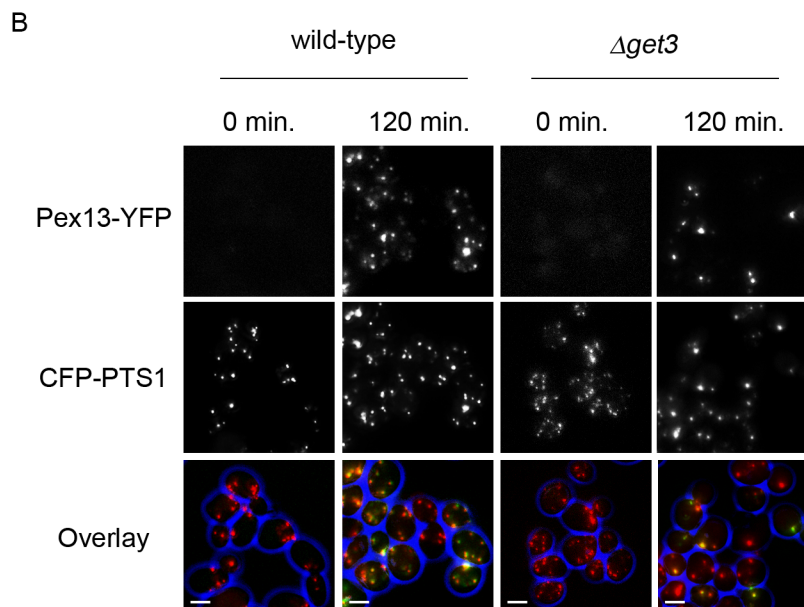

Supplementary Figure S4 Van der Zand et al.
